# Supplementary material for: B cell peripheral tolerance is promoted by cathepsin B protease
Source: PubMed Central journal article supplement (PMC10120085; doi:10.1073/pnas.2300099120), 2023-04-11
Supplement: pnas.2300099120.sapp.pdf [file pnas.2300099120.sapp.pdf]

## **Supporting Information for**

## **B cell peripheral tolerance is promoted by cathepsin B protease**

Marissa Y. Chou, Dan Liu, Jinping An, Ying Xu, Jason G. Cyster

Jason G. Cyster

Email: [jason.cyster@ucsf.edu](mailto:jason.cyster@ucsf.edu)

### **This PDF file includes:**

Figures S1 to S3

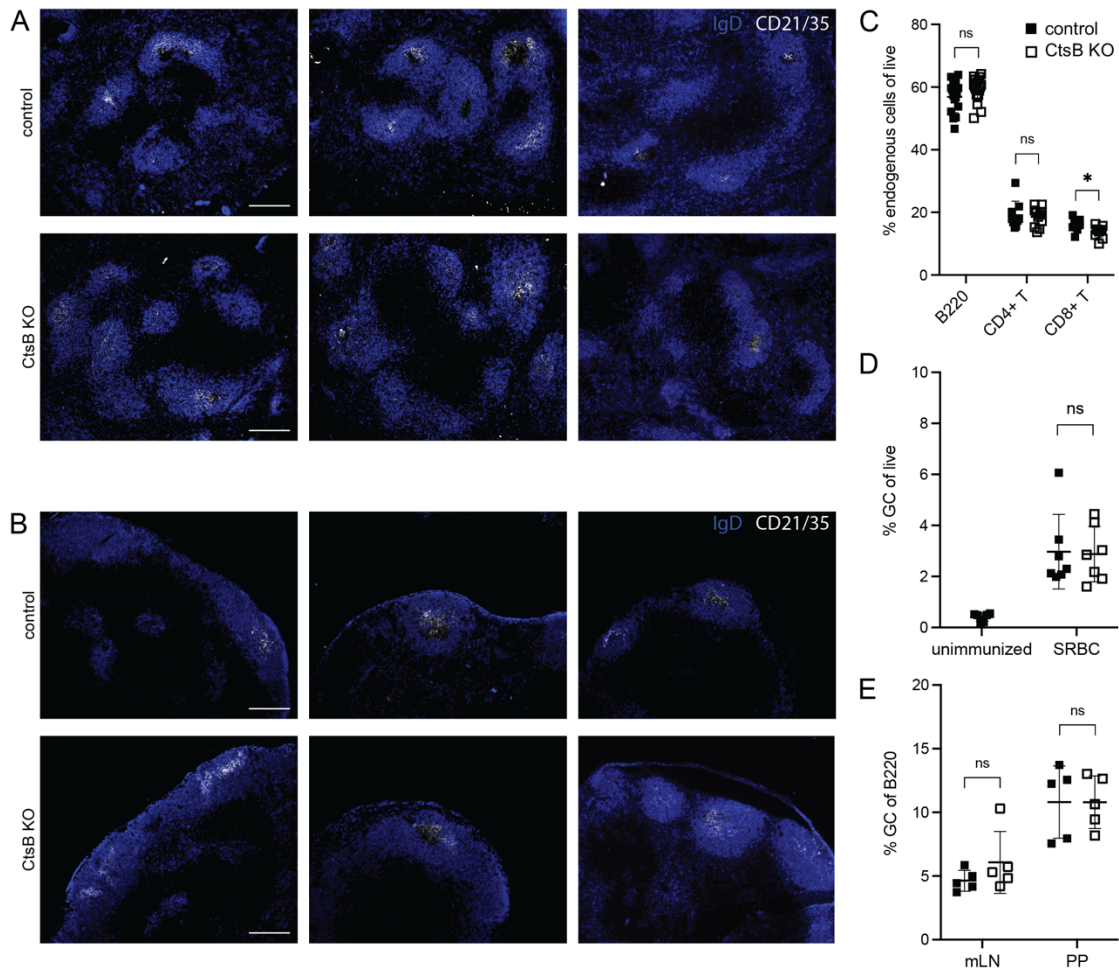

### Supplemental Figure 1

**Fig. S1.** (A, B) Immunofluorescence for B cell follicles (IgD, blue) and FDCs (CD21/35, white) in spleen (A) and peripheral lymph nodes (B) from control (*Ctsb*<sup>+/+</sup> or *Ctsb*<sup>+/-</sup>, top row) or *Ctsb*<sup>-/-</sup> (bottom row) mice. Scale bar, 200  $\mu$ m. Three example images are shown and are representative of multiple cross sections from at least three mice of each type. (C) Frequencies of B, CD4<sup>+</sup> T, and CD8<sup>+</sup> T cells in spleens of control or *Ctsb*-deficient mice (N  $\geq$  9 mice per genotype). (D) Frequencies of germinal center (GC) B cells in spleens of unimmunized mice (n = 6), or control (n = 7) or *Ctsb*-deficient (n = 7) mice 5 days after sheep red blood cell (SRBC) immunization. (E) Frequencies of GC B cells in mesenteric lymph nodes or Peyer's patches of control (n = 5) or *Ctsb*-deficient (n = 5) mice at homeostasis. Each data point indicates an individual mouse and lines indicate means. Error bars represent SDs. D is representative of three experiments. Statistical significance for C–E was determined by unpaired t test. NS, not significant; \*P < 0.05.

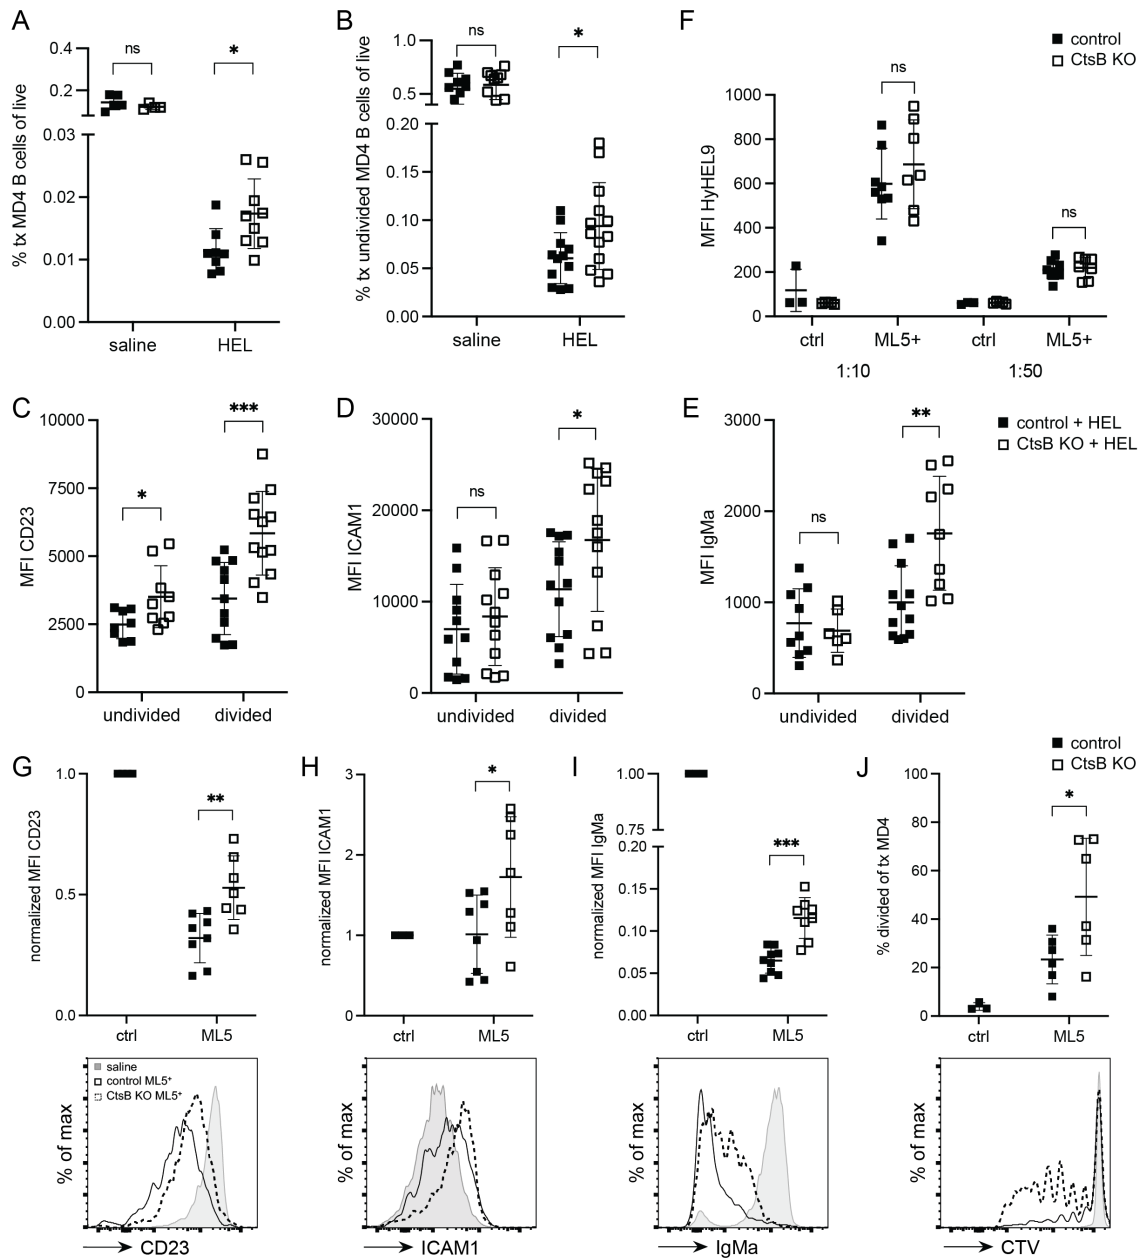

## Supplemental Figure 2

**Fig. S2.** (A) Frequencies of transferred MD4 B cells in lymph nodes of control or *Ctsb*-deficient recipients 3 days after saline ( $n = 5$  control,  $n = 4$  KO mice) or HEL treatment ( $n = 8$  control,  $n = 9$  KO). (B) Frequencies of undivided (CTV-high) transferred MD4 B cells in spleens of control or *Ctsb*-deficient recipients 3 days after saline ( $n = 10$  control,  $n = 10$  KO) or HEL treatment ( $n = 12$  control,  $n = 13$  KO). (C–E) MFI of CD23 (C), ICAM1 (D), and IgMa (E) on undivided and divided transferred MD4 B cells in control or *Ctsb*-deficient recipients 3 days after HEL treatment ( $N \geq 6$  mice per genotype). (F) MFI of HyHEL9 on MD4 B cells incubated with 1:10 or 1:50 dilutions of sera from control ML5<sup>-</sup> ( $n = 3$ ), *Ctsb*-deficient ML5<sup>-</sup> ( $n = 5$ ), control ML5<sup>+</sup> ( $n = 8$ ), or *Ctsb*-deficient ML5<sup>+</sup> ( $n = 7$ ) mice. (G–I) Normalized MFI (top) and representative histogram plot (bottom) of CD23 (G), ICAM1 (H), and IgMa (I) on transferred MD4 B cells in control ML5<sup>+</sup> ( $n = 8$ ) or *Ctsb*-deficient ML5<sup>+</sup> ( $n = 7$ ) mice 3 days after MD4 B cell adoptive transfer. Control ML5<sup>-</sup> ( $n = 4$ ) mice

used as deletion control. (J) Percentage of divided transferred MD4 B cells (top) or representative histogram plot of CTV (bottom) in control ML5<sup>+</sup> (n = 6) or Ctsb-deficient ML5<sup>+</sup> (n = 6) mice 3 days after MD4 B cell adoptive transfer. Control ML5<sup>-</sup> (n = 3) mice used as deletion control. Each data point indicates an individual mouse and lines indicate means. Error bars represent SDs. A and C–J are representative of three experiments. Statistical significance for A–J was determined by unpaired t test. NS, not significant; \*P < 0.05; \*\*P < 0.01.

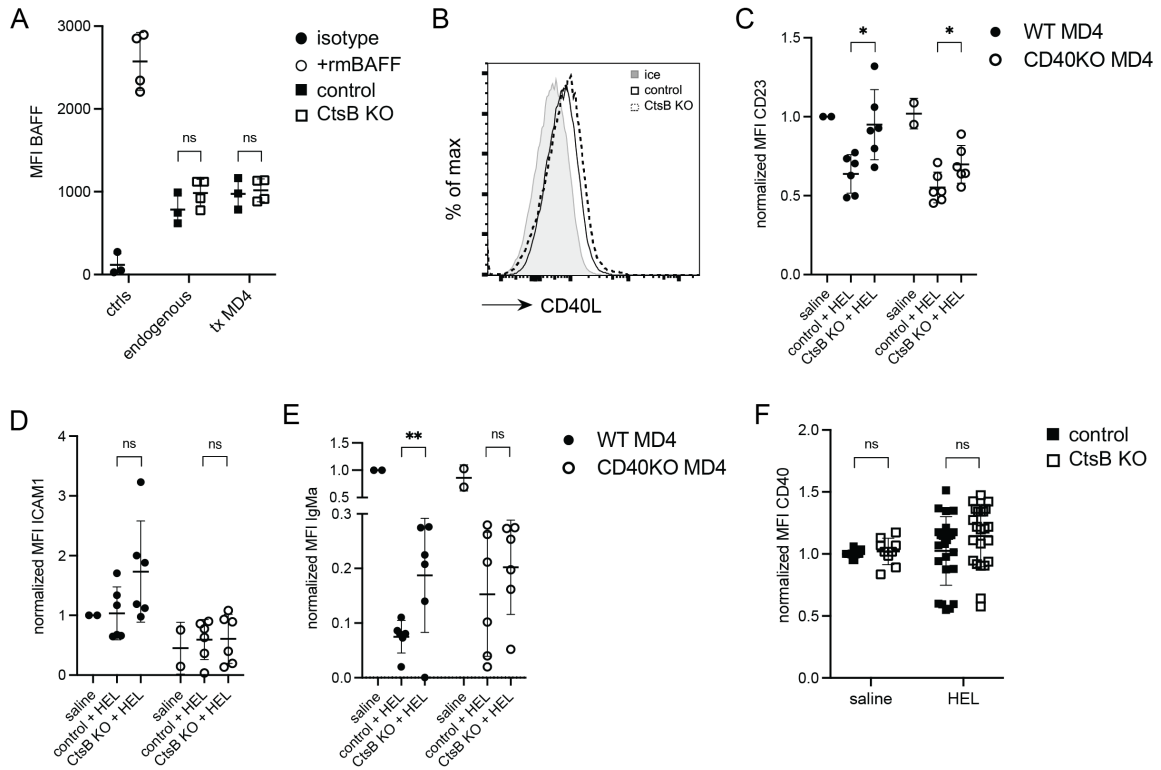

### Supplemental Figure 3

**Fig. S3.** (A) MFI of anti-BAFF staining on endogenous B cells and transferred MD4 B cells at day 3 in control (n = 3) or Ctsb-deficient (n = 3) mice. Control column (ctrls) indicates staining with control antibody (isotype) or pre-incubation with 10  $\mu$ g/mL recombinant mouse BAFF (+rmBAFF) prior to anti-BAFF staining. (B) Representative histogram plot of CD40L on purified CD4<sup>+</sup> T cells kept on ice or incubated in a dilute culture for 2 h at 37°C. (C–E) Normalized MFI of CD23 (C), ICAM1 (D), and IgMa (E) on transferred WT or CD40-deficient MD4 B cells 3 days after saline (n = 2 control, n = 2 KO) or HEL treatment (n = 6 control, n = 6 KO). (F) Normalized MFI of CD40 on transferred MD4 B cells 3 days after saline (n = 11 control, n = 9 KO) or HEL treatment (n = 24 control, n = 23 KO). Each data point indicates an individual mouse and lines indicate means. Error bars represent SDs. A and C–E are representative of three experiments. Statistical significance for A and C–F was determined by unpaired t test. NS, not significant; \*P < 0.05; \*\*P < 0.01.
